# Supplementary material
Source: publisher figshare collection journal article supplement (https://acs.figshare.com/ndownloader/files/13213028)
Supplement: Supplementary file 1 [file 13213028]

## Supporting Information

**Title:** Characterization of interactions and phospholipid transfer between substrate binding proteins of the OmpC-Mla system

**Authors:** Bilge Ercan<sup>†,||</sup>, Wen Yi Low<sup>†,||</sup>, Xuejun Liu<sup>‡</sup>, Shu-Sin Chng<sup>\*,†,§</sup>

### Affiliations:

<sup>†</sup>Department of Chemistry, National University of Singapore, Singapore 117543.

<sup>‡</sup>School of Pharmacy, University College London, United Kingdom

<sup>§</sup>Singapore Center for Environmental Life Sciences Engineering (SCELSE-NUS), Singapore 117456.

<sup>||</sup>These authors contributed equally to this work.

<sup>\*</sup>To whom correspondence should be addressed. E-mail: [chmchngs@nus.edu.sg](mailto:chmchngs@nus.edu.sg)

## Materials and Methods.

**Growth conditions.** Luria-Bertani (LB) broth and agar were prepared as previously described.<sup>1</sup> Unless otherwise noted, ampicillin (Amp) was used at a concentration of 200 µg/mL and chloroamphenicol (Cam) at 15 µg/mL. *para*-benzoyl-L-phenylalanine (*p*Bpa) (Alfa Aesar) was dissolved in 1 M NaOH and used at a concentration of 1 mM.

**Bacterial strains and plasmid construction.** All bacterial strains and plasmids used in this study are summarized in Table S1 and S2, respectively. Strains MC4100 [*F*<sup>-</sup> *araD139*  $\Delta$ (*argF-lac*) *U169 rpsL150 relA1 flbB5301 ptsF25 deoC1 ptsF25 thi*]<sup>2</sup> and BL21( $\lambda$ DE3) [*F*<sup>-</sup> *ompT gal dcm lon hsdS<sub>B</sub>(r<sub>B</sub><sup>-</sup>m<sub>B</sub><sup>-</sup>)*  $\lambda$ (DE3 [*lacI lacUV5-T7 gene 1 ind1 sam7 nin5*]) [*malB*<sup>+</sup>]<sub>K-12</sub>( $\lambda$ <sup>S</sup>)] (Novagen) were used for *in vivo* and protein overexpression experiments, respectively. For overexpression of MlaC, the plasmid pET22/42<sup>3</sup> was used to construct pET22/42*mlaC-His*. DNA fragment encoding full length MlaC was amplified by PCR using MC4100 genomic DNA template and primers listed in Table S3. The amplified DNA fragments were digested with XhoI and NdeI enzymes (New England Biolabs) and ligated into the same restriction sites of pET22/42. The plasmid pET23/42<sup>4</sup> was used to construct pET23/42*mlaC-His* and pET23/42*mlaD-His* with the same strategy. For *in vivo* UV-crosslinking experiments, amber mutants of MlaC and MlaD were constructed by site-directed mutagenesis using the primers listed in Table S3 and pET23/42*mlaC-His* and pET23/42*mlaD-His* as templates, respectively. For *in vitro* UV-crosslinking, MlaC<sub>V171pBpa</sub> and MlaC<sub>V60pBpa</sub> were constructed by using pET22/42*mlaC-His* as template. NovaBlue cells were transformed with the ligation products and selected on LB plates

containing respective antibiotics. All constructs were verified by DNA sequencing (Axil Scientific, Singapore).

***In vivo UV-crosslinking experiments with whole cell lysates.*** The reported protocol<sup>5</sup> was modified for all in vivo UV-crosslinking experiments. For MlaC crosslinking, MC4100  $\Delta mlaC::kan$  background cells harbouring two plasmids, pSupBpaRS-6TRN and pET23/42*mlaC-His* with the amber stop codon (TAG) introduced at selected positions, were used. For validation purposes, the same two plasmids were introduced into  $\Delta mlaA::kan$  and/or  $\Delta mlaD::kan$  background cells. For MlaD crosslinking, MC4100, MC4100  $\Delta mlaC::kan$  and MC4100  $\Delta mlaD::kan$  background cells harbouring two plasmids, pSupBpaRS-6TRN and pET23/42*mlaD-His* with the amber stop codon (TAG) introduced at selected positions, were used. For each experiment, an overnight 3-mL culture was grown in LB with antibiotics from a single colony at 37 °C. Overnight cultures were diluted 1:100 into 5 mL of the same media containing 1 mM *pBpa* and grown until OD<sub>600</sub> ~0.6-0.7. The cultures were pelleted and resuspended in 2 mL ice cold TBS (20 mM Tris pH 8.0, 150 mM NaCl). Samples were either used directly or irradiated with UV light (analytikjena) at 365 nm for 15 min at room temperature. The samples were pelleted again and resuspended in 2X Laemmli buffer (normalized by their respective optical densities), boiled for 10 min, and centrifuged for five min at 13,000 x g in a microcentrifuge at room temperature; 15 µL of each sample were subjected to SDS-PAGE, using 4-12% Tris.HCl stacking gels<sup>6</sup>, and immunoblot analyses.

***In vivo UV-crosslinking and subsequent pull-down experiments and mass spectrometry analyses.*** Affinity purification experiments were carried out in MC4100  $\Delta mlaC::kan$  and

*ΔmlaD::kan* background strains containing two plasmids, pSupBpaRS-6TRN and pET23/42*mlaC<sub>V171</sub>pBpa-His*. A 1.5-L culture (inoculated from an overnight culture at 1:100 dilution), supplemented with antibiotics and 1mM *pBpa*, was grown at 37 °C until OD<sub>600</sub> of ~0.6. Cells were pelleted by centrifugation at 4, 700 x *g* for 20 min and subsequently resuspended in 40 mL TBS (20 mM Tris-HCl pH 8.0, 300 mM NaCl). The cells were either used directly or irradiated with UV light (analytikjena) at 365 nm for 30 min at room temperature in a petri dish. The samples were then supplemented with 1 mM PMSF (Calbiochem), 50 µg/mL DNase I (Sigma-Aldrich) and 100 µg/mL lysozyme (Calbiochem) before being passed twice through a high pressure French Press (French Press G-M, Glen Mills) homogenizer at 20,000 psi. Cell debris was removed by centrifugation at 4,700 x *g* for 10 min at 4 °C. Subsequently, the supernatant was subjected to ultra-centrifugation (Model Optima L-100K, Beckman Coulter) at 145,000 x *g* for 1 h at 4 °C to separate membrane and soluble fractions. The soluble fraction was incubated with 2 mL TALON cobalt resin (Clontech) and rocked for 30 min on ice. The membrane fraction was extracted with 5 ml TBS (20 mM Tris-HCl pH 8.0, 300 mM NaCl) containing 5 mM imidazole, 5 mM MgCl<sub>2</sub>, 10% glycerol, 1% n-Dodecyl β-D-maltoside (DDM) and rocked for 1 h on ice before being subjected to ultra-centrifugation (Model Optima L-100K, Beckman Coulter) at 145,000 x *g* for 1 h at 4 °C. The supernatant from this membrane fraction was then incubated with 1 mL TALON cobalt resin (Clontech) and rocked for 30 min on ice. The resin mixtures were later loaded onto gravity columns. The filtrates were collected, and the columns were washed with either 8 x 10 mL TBS (20 mM Tris-HCl pH 8.0, 300 mM NaCl) containing 20 mM imidazole or 10 x 2 mL TBS (20 mM Tris-HCl pH 8.0, 300 mM NaCl) containing 20 mM imidazole, 5 mM MgCl<sub>2</sub>, 10% glycerol and 0.05% DDM for the soluble and membrane fraction, respectively. Proteins from the soluble fraction were eluted from the

columns with 8 mL of 20 mM Tris.HCl pH 8.0, 150 mM NaCl, 200 mM imidazole while proteins from the membrane fraction were eluted from the columns with 2.5 mL of 20 mM Tris-HCl pH 8.0, 150 mM NaCl, 200 mM imidazole, 5 mM MgCl<sub>2</sub>, 10% glycerol and 0.05% DDM. The eluates were concentrated in a 10 kDa cut-off ultra-filtration device (Amicon Ultra, Merck Millipore) by centrifugation at 4,000 x g to ~100 µL. The concentrated sample was mixed with equal amounts of 2X Laemmli buffer, boiled at 100 °C for 10 min, and subjected to SDS-PAGE, using 4-12% Tris.HCl stacking gels<sup>6</sup>, immunoblot analyses and silver staining (Silver Quest, Invitrogen). The desired protein bands together with their respective controls were carefully excised with a surgical scalpel from a silver stained gel. Samples for tandem MS were kept in sterile 1.5-mL centrifuge tubes before submission for analyses at Taplin Biological Mass Spectrometry Facility, Harvard Medical School, Boston, USA.

***OM permeability studies.*** SDS/EDTA sensitivity of cells expressing only MlaC/D<sub>pBpa</sub> variants was evaluated by efficiency-of-plating (EOP) analyses on LB agar plates containing appropriate antibiotics and indicated concentrations of pBpa and SDS/EDTA. 5-mL cultures (inoculated from an overnight culture at 1:100 dilution), were grown in LB broth at 37 °C until OD<sub>600</sub> of ~0.6. The various cultures were normalized by optical density, first diluted to OD<sub>600</sub> = 0.5 (~0.5x10<sup>8</sup> cells) and then serially diluted (5-fold) in LB broth using 96-well microtiter plates. 2 µL of the diluted cultures were manually spotted onto the plates, dried, and incubated overnight at 37 °C. Plate images were visualized by G:Box Chemi-XT4 (Genesys version 1.4.3.0, Syngene).

***Overexpression and purification of MlaC-His, MlaC<sub>V171pBpa</sub>-His, MlaC<sub>V60pBpa</sub>-His.*** MlaC-His was over-expressed and purified from BL21( $\lambda$ DE3) harboring pET22/42*mlaC-His*. MlaC<sub>V171pBpa</sub>-His or MlaC<sub>V60pBpa</sub>-His was overexpressed and purified from BL21( $\lambda$ DE3) harboring pSupBpaRS-6TRN together with pET22/42*mlaC<sub>V171pBpa</sub>-His* or pET22/42*mlaC<sub>V60pBpa</sub>-His*, respectively. A 5-mL culture was grown from a single colony in LB broth supplemented with antibiotics at 37 °C until OD<sub>600</sub> ~ 0.6. The cell culture was then used to inoculate into 500 mL LB broth (containing 1 mM *pBpa* for amber mutants) and grown at the same temperature until OD<sub>600</sub> ~0.6-0.7. At this time, for WT MlaC-His and MlaC<sub>V171pBpa</sub>-His, 1 mM IPTG was added to the cultures and grown at 37 °C for 3 h. For MlaC<sub>V60pBpa</sub>-His, 0.1 mM IPTG was added to the cultures and grown at 18 °C for overnight. Cells were pelleted by centrifugation at 4,700 x g for 20 min and then resuspended in 20 mL TBS pH 8 (20 mM Tris.HCl pH 8, 300 mM NaCl, 5 mM imidazole). Buffers were supplemented with 1 mM PMSF (Calbiochem), 50  $\mu$ g/mL DNase I (Sigma-Aldrich) and 100  $\mu$ g/mL lysozyme (Calbiochem). Resuspended cells were passed twice through a high-pressure French Press (French Press G-M, Glen Mills) homogenizer at 20,000 psi. Cell debris was removed by centrifugation at 4,700 x g for 10 min at 4 °C. Subsequently, supernatant was subjected to ultra-centrifugation (Model Optima L-100K, Beckman Coulter) at 145,000 x g for 1 h at 4 °C to separate membrane and soluble fractions. Soluble fraction was incubated with 2 mL TALON cobalt resin (Clontech) and rocked for 30 min on ice. The resin mixtures were later loaded onto gravity column. The filtrates were collected, and the columns were washed with 4 x 20 mL TBS pH 8.0 containing 20 mM imidazole. Proteins were eluted from columns with 8 mL of 20 mM Tris.HCl pH 8.0, 150 mM NaCl, 200 mM imidazole. The eluates were concentrated in a 10 kDa cut-off ultra-filtration device (Amicon Ultra, Merck Millipore) by centrifugation at 4,000 x g to ~500  $\mu$ L. Proteins were further purified by SEC

system (AKTA, GE Healthcare) at 4 °C on a prepacked Superdex 200 increase 10/300 GL column, using 20 mM Tris.HCl pH 8.0, 150 mM NaCl as the eluents. sMlaD-His and dLolB-His were over-expressed and purified as previously described<sup>3</sup>.

***In vitro UV-crosslinking of MlaC<sub>V171pBpa</sub>-His, MlaC<sub>V60pBpa</sub>-His and sMlaD-His.*** Purified sMlaD-His (0.03 mM, 0.38 mg) was incubated for 30 min with either MlaC<sub>V171pBpa</sub>-His (0.21 mM, 0.5 mg) or MlaC<sub>V60pBpa</sub>-His (0.21  $\mu$ M, 0.5 mg) in 100  $\mu$ L of TBS (20 mM Tris-HCl pH 8.0, 150 mM NaCl) on ice. The mixtures were either used directly or irradiated with UV light for 20 min as described for the in vivo crosslinking experiments. 200  $\mu$ L 2X Laemmli buffer were then added to the samples. Samples were heated for 10 min at 100 °C and centrifuged for 5 min at 13,000 x g in a microcentrifuge at room temperature; 15  $\mu$ L of each sample were subjected to SDS-PAGE, using 4-12% Tris.HCl stacking gels<sup>6</sup>, and Coomassie Blue staining (Sigma-Aldrich).

***Purification of apo MlaC-His and apo sMlaD-His.*** 500-mL cell culture pellet was resuspended in 20 mL of lysis buffer (20 mM Tris.HCl pH 8, 300 mM NaCl, 5 mM imidazole, 8 M urea). Resuspended cells were rocked for 1.5 h at room temperature. Cell debris was removed by centrifugation at 4,700 x g for 10 min at 4 °C. Subsequently, the supernatant was subjected to ultra-centrifugation (Model Optima L-100K, Beckman Coulter) at 145,000 x g for 1 h at 4 °C to separate membrane and soluble fractions. The supernatant was incubated with 2 mL TALON cobalt resin (Clontech), by rocking for 2 h at room temperature. The resin mixture was later loaded onto a column allowed to drain by gravity. The column was washed with 2 x 20 mL of wash buffer 1 (20 mM Tris.HCl pH 8, 300 mM NaCl, 20 mM SDS, 8 M urea) and 2 x 20 mL of wash buffer 2 (20 mM Tris.HCl pH 8, 300 mM NaCl, 20 mM imidazole, 8 M urea) and eluted

with 8 mL of elution buffer (20 mM Tris.HCl pH 8, 150 mM NaCl, 200 mM imidazole, 8 M urea). The eluate was pipetted into Spectra/Por 3, 3.5 kDa MWCO, 18 mm flat width dialysis membranes and dialyzed against 20 mM Tris.HCl pH 8, 150 mM NaCl for 2 h and then overnight. Next morning, the protein solution was transferred to a 10 kDa cut-off ultra-filtration device (Amicon Ultra, Merck Millipore) and concentrated by centrifugation at 4,000 x g to ~500  $\mu$ L and further purified by SEC system (AKTA, GE Healthcare) at 4 °C on a prepacked Superdex 200 increase 10/300 GL column using 20 mM Tris.HCl pH 8, 150 mM NaCl, as the running buffer.

***Overexpression of MlaC with a cleavable His-tag for antibody generation.*** The vector pETMHis-MlaC expressing MlaC with a thrombin cleavable N-terminal His-tag was introduced into BL21( $\lambda$ DE3). Cell culture growth and affinity purification were performed according to the same protocol as MlaC-His. The eluate was dialyzed to remove imidazole in the elution buffer. Dialyzed solution was concentrated in a 10 kDa cut-off ultra-filtration device (Amicon Ultra, Merck Millipore) by centrifugation at 4,000 x g to ~250  $\mu$ L. Tagless MlaC was prepared by cleaving the N-terminal His-tag with the addition of thrombin (1 U/0.3 mg His-MlaC) following Co-TALON affinity chromatography. After overnight digestion, protease activity was stopped by adding 2 mM protease inhibitor, PMSF. Liberated proteins were further purified by SEC system (AKTA, GE Healthcare) at 4 °C on a prepacked Superdex 200 10/300 GL column using 20 mM Tris.HCl pH 8, 150 mM NaCl, as the running buffer. Fractions containing pure proteins were pooled together and concentrated. The proteins were sent to Pacific Immunology for raising polyclonal antibodies in New Zealand rabbits.



***Lipid extraction and thin layer chromatography.*** 1 mg/100 uL of purified proteins were used for the PL extraction according to the Bligh-Dyer method.<sup>8</sup> Purified protein solutions were mixed with 3.75 volumes of chloroform:methanol (1:2 vol/vol). The mixtures were vortexed and sonicated sequentially for 30 seconds for three times. The mixtures were centrifuged at 21,000 x g for 5 min, and the supernatant was recovered. 1.25 volumes of chloroform and 1.25 volumes of TBS were added to the supernatants. The mixtures were then centrifuged at 4000 x g for 5 min to separate organic and aqueous phases. The organic phase was gently removed to another vial, and the organic solvent was evaporated under N<sub>2</sub> gas. Remaining dried lipids were dissolved in 10 uL chloroform:methanol (4:1 vol/vol) and loaded onto a TLC Silica gel 60 F<sub>254</sub> plate (Merck). The plate was developed by chloroform:methanol:water (65:25:4) solvent system, left to dry at room temperature and then stained with iodine vapor for 15 min.

***In vitro PL transfer assay.*** 3 mg purified native or apo sMlaD-His was incubated with 4.07 mg apo or native MlaC-His in a 500 uL reaction mixture for 1 h on ice. This gives 1:6 sMlaD-His hexamers:MlaC-His molar ratio. Next, the mixture was separated by SEC (AKTA, GE Healthcare) at 4 °C on a prepacked Superdex 200 increase 10/300 GL column. The fractions belonging to the two proteins were collected and concentrated with 10 kDa and 50 kDa cut-off ultra-filtration device (Amicon Ultra, Merck Millipore) for MlaC-His (holo or apo) and sMlaD-His (holo or apo), respectively. Lipids were extracted from the respective proteins as described above.

***<sup>31</sup>P Nuclear magnetic resonance (NMR) analysis for extracted phospholipid species from MlaC-His.*** To find out the selectivity of MlaC-His for different PL head groups, we performed

<sup>31</sup>P NMR analysis with Bruker AV500 (500 MHz) instrument as previously reported.<sup>3</sup> Commercial *E. coli* phosphatidylethanolamine (PE), phosphatidylglycerol (PG) and cardiolipin (CL) (Avanti Polar Lipids) were used as standards. Lipids from MlaC-His (from 4 mg of purified protein) were extracted as described above. Organic solvents from samples were evaporated under N<sub>2</sub> gas and remaining dried lipids were resuspended in 1 mL water containing 5 % Triton X-100 (w/v) and 10 % D<sub>2</sub>O (v/v), and subsequently sonicated for 1 h at room temperature. NMR analysis was performed at room temperature and acquisition times for all samples were 10 h (40,000 number of scans (NS)). Fourier transformation of FID files and integration of phosphate peak areas were done in MestReNova 9.0 software.

***SDS-PAGE, immunoblotting and silver staining.*** All samples subjected to SDS-PAGE were mixed with equal amounts of 2X Laemmli reducing buffer. The samples were subsequently either kept at room temperature (- heat) or subjected to boiling at 100°C for 10 min (+ heat). Equal volumes of the samples were loaded onto the gels. Unless otherwise stated, SDS-PAGE was performed according to Laemmli using the 4-20% Tris.HCl gradient gels.<sup>6</sup> After SDS-PAGE, gels were visualized by either Coomassie Blue staining (Sigma-Aldrich), silver staining (Life Technologies) or subjecting to immunoblotting.

Immunoblotting was performed by transferring protein bands from the gels onto polyvinylidene fluoride (PVDF) membranes (Immun-Blot<sup>®</sup> 0.2 µm, Bio-Rad) using semi-dry electroblotting system (Trans-Blot<sup>®</sup> Turbo<sup>™</sup> Transfer System, Bio-Rad). Membranes were blocked by 1X casein blocking buffer (Sigma-Aldrich). α-His antibody (pentahistidine) conjugated to the horseradish peroxidase (HRP) (Qiagen) was used at a dilution of 1:5,000. Mouse α-MlaA was used at a dilution of 1:3000. Sheep α-Mouse conjugated to HRP (GE

Healthcare) was used at a dilution of 1:5000. Rabbit  $\alpha$ -MlaC was used at a dilution of 1:500. Donkey  $\alpha$ -Rabbit conjugated to HRP (GE Healthcare) was used at a dilution of 1:5000. Luminata Forte Western HRP Substrate (Merck Milipore) was used to develop the membranes and chemiluminescence signals were visualized by G:Box Chemi-XX 6 (Genesys version 1.4.3.0, Syngene).

***Visualization of channels in the sMlaD crystal structure.*** The CAVER PyMOL plugin v3.0<sup>11</sup> was used to detect and visualize possible cavities in static sMlaD crystal structure (PDB: 5UW2)<sup>12</sup>. Default settings were used.

**Table S1.** Bacteria strains used in this study.

| <b>Strains</b> | <b>Relevant genotypes or characteristics</b>                                                                                                                                                              | <b>Reference</b> |
|----------------|-----------------------------------------------------------------------------------------------------------------------------------------------------------------------------------------------------------|------------------|
| MC4100         | <i>F<sup>-</sup> araD139 Δ(argF-lac) U169 rpsL150 relA1 flbB5301 ptsF25 deoC1 ptsF25 thi</i>                                                                                                              | Lab collection   |
| Novablue       | <i>endA1 hsdR17 (r<sub>K12</sub><sup>-</sup> m<sub>K12</sub><sup>+</sup>) supE44 thi-1 recA1 gyrA96 relA1 lac F' [proA<sup>+</sup>B<sup>+</sup>lacI<sup>q</sup>ZΔM15::Tn10]</i>                           | Novagen          |
| BL21(λDE3)     | <i>F<sup>-</sup> ompT gal dcm lon hsdS<sub>B</sub>(r<sub>B</sub><sup>-</sup>m<sub>B</sub><sup>-</sup>) λ(DE3 [lacI lacUV5-T7 gene 1 ind1 sam7 nin5]) [malB<sup>+</sup>]<sub>K-12</sub>(λ<sup>S</sup>)</i> | Novagen          |
| CZS009         | MC4100 Δ <i>mlaA</i> :: <i>kan</i>                                                                                                                                                                        | 7                |
| CZS011         | MC4100 Δ <i>mlaC</i> :: <i>kan</i>                                                                                                                                                                        | This study       |
| CZS012         | MC4100 Δ <i>mlaD</i> :: <i>kan</i>                                                                                                                                                                        | 3                |

**Table S2.** Plasmids used in this study.

| Plasmids                  | Relevant genotypes or characteristics                                                                                            | References |
|---------------------------|----------------------------------------------------------------------------------------------------------------------------------|------------|
| pET23/42                  | pT7 inducible expression vector, contains multiple cloning site of pET42a(+) in pET23a(+) backbone; Amp <sup>R</sup>             | 7          |
| pET22/42                  | pT7lac inducible expression vector, contains multiple cloning site of pET42a(+) in pET22b(+) backbone; Amp <sup>R</sup>          | 3          |
| pSup-BpaRS-6TRN           | Encodes an orthogonal tRNA and aminoacyl-tRNA synthetase permitting ribosomal incorporation of <i>p</i> Bpa at TAG stop codons   | 10         |
| pET23/42 <i>mlaC-His</i>  | Encodes full length MlaC with C-terminal His <sub>8</sub> tag; Amp <sup>R</sup>                                                  | This study |
| pET23/42 <i>mlaD-His</i>  | Encodes full length MlaD with C-terminal His <sub>8</sub> tag; Amp <sup>R</sup>                                                  | This study |
| pET22/42 <i>mlaC-His</i>  | Encodes full length MlaC with C-terminal His <sub>6</sub> tag; Amp <sup>R</sup>                                                  | This study |
| pET22/42 <i>smlaD-His</i> | Encodes soluble domain of MlaD with C-terminal His <sub>6</sub> tag; Amp <sup>R</sup>                                            | 3          |
| pETMHis- <i>mlaC</i>      | Encodes MlaC without its signal sequences with N-terminal His <sub>6</sub> tag with a thrombin cleavage site; Amp <sup>R</sup> . | This study |

**Table S3.** Primers used in this study.

| <b>Primers</b>      | <b>Sequence (5' to 3')*/**</b>                       |
|---------------------|------------------------------------------------------|
| MlaC-C-XhoI         | ATA <u>CCT CGA GTT</u> TTT TCT CTT CCA GAG           |
| MlaC-N-NdeI         | GAG <u>CCA TAT GTT</u> TAA ACG TTT AAT GAT GG        |
| MlaC-T25pBpa-N FWD  | GCG GCA GAC CAG <b>TAG</b> AAT CCG TAT AAG           |
| MlaC-T25pBpa-C REV  | CTT ATA CGG ATT <b>CTA</b> CTG GTC TGC CGC           |
| MlaC-Y28pBpa-N FWD  | CAG ACC AAT CCG <b>TAG</b> AAG CTG ATG GAC           |
| MlaC-Y28pBpa-C REV  | GTC CAT CAG CTT <b>CTA</b> CGG ATT GGT CTG           |
| MlaC-F39pBpa-N FWD  | GCG CAG AAA ACG <b>TAG</b> GAT CGC CTG AAG           |
| MlaC-F39 pBpa-C REV | CTT CAG GCG ATC <b>CTA</b> CGT TTT CTG CGC           |
| MlaC-R41pBpa-N FWD  | GCG CAG AAA ACG TTC GAT <b>TAG</b> CTG AAG AAT GAG C |
| MlaC-R41pBpa-C REV  | G CTC ATT CTT CAG <b>CTA</b> ATC GAA CGT TTT CTG CGC |
| MlaC-E45pBpa-N FWD  | CGC CTG AAG AAT <b>TAG</b> CAA CCG CAA A             |
| MlaC-E45pBpa-C REV  | T TTG CGG TTG <b>CTA</b> ATT CTT CAG GCG             |
| MlaC-Q46pBpa-N FWD  | CTG AAG AAT GAG <b>TAG</b> CCG CAA ATT CGG           |
| MlaC-Q46pBpa-C REV  | CCG AAT TTG CGG <b>CTA</b> CTC ATT CTT CAG           |
| MlaC-R50pBpa-N FWD  | CAA CCG CAA ATT <b>TAG</b> CGG AAC CCG G             |
| MlaC-R50pBpa-C REV  | C CGG GTT CCG <b>CTA</b> AAT TTG CGG TTG             |
| MlaC-Y55pBpa-N FWD  | GCC AAC CCG GAT <b>TAG</b> CTG CGT ACC ATT           |
| MlaC-Y55pBpa-C REV  | AAT GGT ACG CAG <b>CTA</b> ATC CGG GTT GGC           |
| MlaC-Q62pBpa-N FWD  | ACC ATT GTT GAT <b>TAG</b> GAA CTG CTG CCA           |
| MlaC-Q62pBpa-C REV  | TGG CAG CAG TTC <b>CTA</b> ATC AAC AAT GGT           |
| MlaC-Y67pBpa-N FWD  | GAA CTG CTG CCA <b>TAG</b> GTA CAG GTG AAA           |
| MlaC-Y67pBpa-C REV  | TTT CAC CTG TAC <b>CTA</b> TGG CAG CAG TTC           |
| MlaC-Y72pBpa-N FWD  | GTA CAG GTG AAA <b>TAG</b> GCC GGT GCG CTG           |
| MlaC-Y72pBpa-C REV  | CAG CGC ACC GGC <b>CTA</b> TTT CAC CTG TAC           |
| MlaC-L76pBpa-N FWD  | AAA TAC GCC GGT GCG <b>TAG</b> GTG CTG GGC CAG TAT   |
| MlaC-L76pBpa-C REV  | ATA CTG GCC CAG CAC <b>CTA</b> CGC ACC GGC GTA TTT   |
| MlaC-Y81pBpa-N FWD  | TG CTG GGC CAG <b>TAG</b> TAC AAG AGT GC             |
| MlaC-Y81pBpa-C REV  | GC ACT CTT GTA <b>CTA</b> CTG GCC CAG CA             |
| MlaC-F94pBpa-N FWD  | GT GAA GCC TAC <b>TAG</b> GCC GCT TTC CGT            |
| MlaC-F94pBpa-C REV  | ACG GAA AGC GGC <b>CTA</b> GTA GGC TTC AC            |
| MlaC-A95pBpa-N FWD  | GAA GCC TAC TTT <b>TAG</b> GCT TTC CGT GAG           |
| MlaC-A95pBpa-C REV  | CTC ACG GAA AGC <b>CTA</b> AAA GTA GGC TTC           |
| MlaC-Y100pBpa-N FWD | GCT TTC CGT GAG <b>TAG</b> CTG AAG CAG GCT           |
| MlaC-Y100pBpa-C REV | AGC CTG CTT CAG <b>CTA</b> CTC ACG GAA AGC           |
| MlaC-K102pBpa-N FWD | CGT GAG TAC CTG <b>TAG</b> CAG GCT TAC GGT           |
| MlaC-K102pBpa-C REV | ACC GTA AGC CTG <b>CTA</b> CAG GTA CTC ACG           |
| MlaC-M111pBpa-N FWD | G GCG CTG GCG <b>TAG</b> TAT CAC GGT CAA             |
| MlaC-M111pBpa-C REV | TTG ACC GTG ATA <b>CTA</b> CGC CAG CGC C             |
| MlaC-Y112pBpa-N FWD | CG CTG GCG ATG <b>TAG</b> CAC GGT CAA A              |
| MlaC-Y112pBpa-C REV | T TTG ACC GTG <b>CTA</b> CAT CGC CAG CG              |
| MlaC-H113pBpa-N FWD | CTG GCG ATG TAT <b>TAG</b> GGT CAA ACC TAT           |
| MlaC-H113pBpa-C REV | ATA GGT TTG ACC <b>CTA</b> ATA CAT CGC CAG           |

|                              |                                                    |
|------------------------------|----------------------------------------------------|
| MlaC-Q115 <i>p</i> Bpa-N FWD | CG ATG TAT CAC GGT <b>TAG</b> ACC TAT CAG ATT GC   |
| MlaC-Q115 <i>p</i> Bpa-C REV | GC AAT CTG ATA GGT <b>CTA</b> ACC GTG ATA CAT CG   |
| MlaC-Y117 <i>p</i> Bpa-N FWD | CAC GGT CAA ACC <b>TAG</b> CAG ATT GCG CCA         |
| MlaC-Y117 <i>p</i> Bpa-C REV | TGG CGC AAT CTG <b>CTA</b> GGT TTG ACC GTG         |
| MlaC-E122 <i>p</i> Bpa-N FWD | G ATT GCG CCA <b>TAG</b> CAG CCG CTG G             |
| MlaC-E122 <i>p</i> Bpa-C REV | C CAG CGG CTG <b>CTA</b> TGG CGC AAT C             |
| MlaC-L125 <i>p</i> Bpa-N FWD | CCA GAA CAG CCG <b>TAG</b> GGC GAT AAA ACC         |
| MlaC-L125 <i>p</i> Bpa-C REV | GGT TTT ATC GCC <b>CTA</b> CGG CTG TTC TGG         |
| MlaC-T136 <i>p</i> Bpa-N FWD | CCT ATT CGC GTT <b>TAG</b> ATT ATT GAC CCG         |
| MlaC-T136 <i>p</i> Bpa-C REV | CGG GTC AAT AAT <b>CTA</b> AAC GCG AAT AGG         |
| MlaC-I138 <i>p</i> Bpa-N FWD | CGC GTT ACC ATT <b>TAG</b> GAC CCG AAT GGC         |
| MlaC-I138 <i>p</i> Bpa-C REV | GCC ATT CGG GTC <b>CTA</b> AAT GGT AAC GCG         |
| MlaC-R147 <i>p</i> Bpa-N FWD | CGT CCG CCG GTG <b>TAG</b> CTG GAC TTC CAG         |
| MlaC-R147 <i>p</i> Bpa-C REV | CTG GAA GTC CAG <b>CTA</b> CAC CGG CGG ACG         |
| MlaC-D149 <i>p</i> Bpa-N FWD | CCG GTG CGT CTG <b>TAG</b> TTC CAG TGG CG          |
| MlaC-D149 <i>p</i> Bpa-C REV | ACG CCA CTG GAA <b>CTA</b> CAG ACG CAC CGG         |
| MlaC-N155 <i>p</i> Bpa-N FWD | TTC CAG TGG CGT AAA <b>TAG</b> TCC CAG ACG GGC AAT |
| MlaC-N155 <i>p</i> Bpa-C REV | ATT GCC CGT CTG GGA <b>CTA</b> TTT ACG CCA CTG GAA |
| MlaC-W161 <i>p</i> Bpa-N FWD | CAG ACG GGC AAT <b>TAG</b> CAG GCT TAC GAC         |
| MlaC-W161 <i>p</i> Bpa-C REV | GTC GTA AGC CTG <b>CTA</b> ATT GCC CGT CTG         |
| MlaC-Y164 <i>p</i> Bpa-N FWD | AAT TGG CAG GCT <b>TAG</b> GAC ATG ATT GCT         |
| MlaC-Y164 <i>p</i> Bpa-C REV | AGC AAT CAT GTC <b>CTA</b> AGC CTG CCA ATT         |
| MlaC-V171 <i>p</i> Bpa-N FWD | ATT GCT GAA GGC <b>TAG</b> AGT ATG ATC ACC         |
| MlaC-V171 <i>p</i> Bpa-C REV | GGT GAT CAT ACT <b>CTA</b> GCC TTC AGC AAT         |
| MlaC-Q178 <i>p</i> Bpa-N FWD | ATC ACC ACC AAA <b>TAG</b> AAC GAG TGG GGA         |
| MlaC-Q178 <i>p</i> Bpa-C REV | TCC CCA CTC GTT <b>CTA</b> TTT GGT GGT GAT         |
| MlaC-T183 <i>p</i> Bpa-N FWD | AAC GAG TGG GGA <b>TAG</b> CTG CTG CGT ACC         |
| MlaC-T183 <i>p</i> Bpa-C REV | GGT ACG CAG CAG <b>CTA</b> TCC CCA CTC GTT         |
| MlaC-L184 <i>p</i> Bpa-N FWD | GAG TGG GGA ACG <b>TAG</b> CTG CGT ACC AAA         |
| MlaC-L184 <i>p</i> Bpa-C REV | TTT GGT ACG CAG <b>CTA</b> CGT TCC CCA CTC         |
| MlaC-Q196 <i>p</i> Bpa-N FWD | GGC CTG ACT GCG <b>TAG</b> CTG AAA TCG A           |
| MlaC-Q196 <i>p</i> Bpa-C REV | T CGA TTT CAG <b>CTA</b> CGC AGT CAG GCC           |
| MlaC-K198 <i>p</i> Bpa-N FWD | G ACT GCG CAA CTG <b>TAG</b> TCG ATT TCT C         |
| MlaC-K198 <i>p</i> Bpa-C REV | G AGA AAT CGA <b>CTA</b> CAG TTG CGC AGT C         |
| MlaC-F97 <i>p</i> Bpa-N FWD  | TAC TTT GCC GCT <b>TAG</b> CGT GAG TAC CTG         |
| MlaC-F97 <i>p</i> Bpa-C REV  | CAG GTA CTC ACG <b>CTA</b> AGC GGC AAA GTA         |
| MlaC-P124 <i>p</i> Bpa-N FWD | GCG CCA GAA CAG <b>TAG</b> CTG GGC GAT AAA         |
| MlaC-P124 <i>p</i> Bpa-C REV | TTT ATC GCC CAG <b>CTA</b> CTG TTC TGG CGC         |
| MlaC-K128 <i>p</i> Bpa-N FWD | CCG CTG GGC GAT <b>TAG</b> ACC ATT GTG CCT         |
| MlaC-K128 <i>p</i> Bpa-C REV | AGG CAC AAT GGT <b>CTA</b> ATC GCC CAG CGG         |
| MlaC-T129 <i>p</i> Bpa-N FWD | CTG GGC GAT AAA <b>TAG</b> ATT GTG CCT ATT         |
| MlaC-T129 <i>p</i> Bpa-C REV | AAT AGG CAC AAT <b>CTA</b> TTT ATC GCC CAG         |
| MlaC-P132 <i>p</i> Bpa-N FWD | AAA ACC ATT GTG <b>TAG</b> ATT CGC GTT ACC         |
| MlaC-P132 <i>p</i> Bpa-C REV | GGT AAC GCG AAT <b>CTA</b> CAC AAT GGT TTT         |
| MlaC-N141 <i>p</i> Bpa-N FWD | ATT ATT GAC CCG <b>TAG</b> GGC CGT CCG CCG         |

|                              |                                                    |
|------------------------------|----------------------------------------------------|
| MlaC-N141 <i>p</i> Bpa-C REV | CGG CGG ACG GCC <b>CTA</b> CGG GTC AAT AAT         |
| MlaC-R147 <i>p</i> Bpa-N FWD | CGT CCG CCG GTG <b>TAG</b> CTG GAC TTC CAG         |
| MlaC-R147 <i>p</i> Bpa-C REV | CTG GAA GTC CAG <b>CTA</b> CAC CGG CGG ACG         |
| MlaC-D149 <i>p</i> Bpa-N FWD | CCG GTG CGT CTG <b>TAG</b> TTC CAG TGG CG          |
| MlaC-D149 <i>p</i> Bpa-C REV | ACG CCA CTG GAA <b>CTA</b> CAG ACG CAC CGG         |
| MlaC-Q151 <i>p</i> Bpa-N FWD | CGT CTG GAC TTC <b>TAG</b> TGG CGT AAA AAC         |
| MlaC-Q151 <i>p</i> Bpa-C REV | GTT TTT ACG CCA <b>CTA</b> GAA GTC CAG ACG         |
| MlaC-I167 <i>p</i> Bpa-N FWD | GCT TAC GAC ATG <b>TAG</b> GCT GAA GGC GTC         |
| MlaC-I167 <i>p</i> Bpa-C REV | GAC GCC TTC AGC <b>CTA</b> CAT GTC GTA AGC         |
| MlaC-E169 <i>p</i> Bpa-N FWD | GAC ATG ATT GCT <b>TAG</b> GGC GTC AGT ATG         |
| MlaC-E169 <i>p</i> Bpa-C REV | CAT ACT GAC GCC <b>CTA</b> AGC AAT CAT GTC         |
| MlaC-S172 <i>p</i> Bpa-N FWD | GCT GAA GGC GTC <b>TAG</b> ATG ATC ACC ACC         |
| MlaC-S172 <i>p</i> Bpa-C REV | GGT GGT GAT CAT <b>CTA</b> GAC GCC TTC AGC         |
| MlaC-M173 <i>p</i> Bpa-N FWD | GAA GGC GTC AGT <b>TAG</b> ATC ACC ACC AAA         |
| MlaC-M173 <i>p</i> Bpa-C REV | TTT GGT GGT GAT <b>CTA</b> ACT GAC GCC TTC         |
| MlaC-I174 <i>p</i> Bpa-N FWD | GGC GTC AGT ATG <b>TAG</b> ACC ACC AAA CAA         |
| MlaC-I174 <i>p</i> Bpa-C REV | TTG TTT GGT GGT <b>CTA</b> CAT ACT GAC GCC         |
| MlaC-T175 <i>p</i> Bpa-N FWD | GC GTC AGT ATG ATC <b>TAG</b> ACC AAA CAA AAC G    |
| MlaC-T175 <i>p</i> Bpa-C REV | C GTT TTG TTT GGT <b>CTA</b> GAT CAT ACT GAC GC    |
| MlaC-T176 <i>p</i> Bpa-N FWD | AGT ATG ATC ACC <b>TAG</b> AAA CAA AAC GAG         |
| MlaC-T176 <i>p</i> Bpa-C REV | CTC GTT TTG TTT <b>CTA</b> GGT GAT CAT ACT         |
| MlaC-E180 <i>p</i> Bpa-N FWD | ACC AAA CAA AAC <b>TAG</b> TGG GGA ACG CTG         |
| MlaC-E180 <i>p</i> Bpa-C REV | CAG CGT TCC CCA <b>CTA</b> GTT TTG TTT GGT         |
| MlaC-V60 <i>p</i> Bpa-N FWD  | CTG CGT ACC ATT <b>TAG</b> GAT CAG GAA CTG C       |
| MlaC-V60 <i>p</i> Bpa-C REV  | G CAG TTC CTG ATC <b>CTA</b> AAT GGT ACG CAG       |
| MlaD-60 <i>p</i> Bpa-N FWD   | TCT CCG GTC AGT <b>TAG</b> GGT GGC GTT GTT         |
| MlaD-I60 <i>p</i> Bpa-C REV  | AAC AAC GCC ACC <b>CTA</b> ACT GAC CGG AGA         |
| MlaD-V63 <i>p</i> Bpa-N FWD  | AGT ATT GGT GGC <b>TAG</b> GTT GTG GGT CGG         |
| MlaD-V63 <i>p</i> Bpa-C REV  | CCG ACC CAC AAC <b>CTA</b> GCC ACC AAT ACT         |
| MlaD-R67 <i>p</i> Bpa-N FWD  | GTT GTT GTG GGT <b>TAG</b> GTG GCG GAT ATT         |
| MlaD-R67 <i>p</i> Bpa-C REV  | AAT ATC CGC CAC <b>CTA</b> ACC CAC AAC AAC         |
| MlaD-I71 <i>p</i> Bpa-N FWD  | CGG GTG GCG GAT <b>TAG</b> ACG CTG GAC CCG AAA     |
| MlaD-I71 <i>p</i> Bpa-C REV  | TTT CGG GTC CAG CGT <b>CTA</b> ATC CGC CAC CCG     |
| MlaD-L73 <i>p</i> Bpa-N FWD  | GCG GAT ATT ACG <b>TAG</b> GAC CCG AAA ACC         |
| MlaD-L73 <i>p</i> Bpa-C REV  | GGT TTT CGG GTC <b>CTA</b> CGT AAT ATC CGC         |
| MlaD-K76 <i>p</i> Bpa-N FWD  | ATT ACG CTG GAC CCG <b>TAG</b> ACC TAT CTG CCG     |
| MlaD-K76 <i>p</i> Bpa-C REV  | CGG CAG ATA GGT <b>CTA</b> CGG GTC CAG CGT AAT     |
| MlaD-L79 <i>p</i> Bpa-N FWD  | CCG AAA ACC TAT <b>TAG</b> CCG CGC GTA ACG         |
| MlaD-L79 <i>p</i> Bpa-C REV  | CGT TAC GCG CGG <b>CTA</b> ATA GGT TTT CGG         |
| MlaD-H92 <i>p</i> Bpa-N FWD  | GAA CAA CGT TAT AAC <b>TAG</b> ATT CCA GAT ACC AGT |
| MlaD-H92 <i>p</i> Bpa-C REV  | ACT GGT ATC TGG AAT <b>CTA</b> GTT ATA ACG TTG TTC |
| MlaD-T96 <i>p</i> Bpa-N FWD  | CAC ATT CCA GAT <b>TAG</b> AGT TCG CTG AGC         |
| MlaD-T96 <i>p</i> Bpa-C REV  | GCT CAG CGA ACT <b>CTA</b> ATC TGG AAT GTG         |
| MlaD-S100 <i>p</i> Bpa-N FWD | ACC AGT TCG CTG <b>TAG</b> ATT CGT ACT TCC         |
| MlaD-S100 <i>p</i> Bpa-C REV | GGA AGT ACG AAT <b>CTA</b> CAG CGA ACT GGT         |



|                     |                                                    |
|---------------------|----------------------------------------------------|
| MlaD-L106pBpa-N FWD | CGT ACT TCC GGC <b>TAG</b> CTG GGG GAA CAA         |
| MlaD-L106pBpa-C REV | TTG TTC CCC CAG <b>CTA</b> GCC GGA AGT ACG         |
| MlaD-L107pBpa-N FWD | ACT TCC GGC CTG <b>TAG</b> GGG GAA CAA TAT         |
| MlaD-L107pBpa-C REV | ATA TTG TTC CCC <b>CTA</b> CAG GCC GGA AGT         |
| MlaD-N115pBpa-N FWD | CAA TAT CTG GCA TTA <b>TAG</b> GTC GGT TTT GAA GAC |
| MlaD-N115pBpa-C REV | GTC TTC AAA ACC GAC <b>CTA</b> TAA TGC CAG ATA TTG |
| MlaD-F118pBpa-N FWD | TTA AAC GTC GGT <b>TAG</b> GAA GAC CCG GAA         |
| MlaD-F118pBpa-C REV | TTC CGG GTC TTC <b>CTA</b> ACC GAC GTT TAA         |
| MlaD-Q135pBpa-N FWD | GAT GGC GAT ACA ATT <b>TAG</b> GAC ACT AAG TCT GCG |
| MlaD-Q135pBpa-C REV | CGC AGA CTT AGT GTC <b>CTA</b> AAT TGT ATC GCC ATC |
| MlaD-K138pBpa-N FWD | ATT CAG GAC ACT <b>TAG</b> TCT GCG ATG GTG         |
| MlaD-K138pBpa-C REV | CAC CAT CGC AGA <b>CTA</b> AGT GTC CTG AAT         |
| MlaD-M141pBpa-N FWD | ACT AAG TCT GCG <b>TAG</b> GTG CTG GAA GAT         |
| MlaD-M141pBpa-C REV | ATC TTC CAG CAC <b>CTA</b> CGC AGA CTT AGT         |
| MlaD-Q149pBpa-N FWD | GAT CTC ATT GGT <b>TAG</b> TTC CTT TAC GGT         |
| MlaD-Q149pBpa-C REV | ACC GTA AAG GAA <b>CTA</b> ACC AAT GAG ATC         |
| MlaD-F150pBpa-N FWD | CTC ATT GGT CAG <b>TAG</b> CTT TAC GGT AGT         |
| MlaD-F150pBpa-C REV | ACT ACC GTA AAG <b>CTA</b> CTG ACC AAT GAG         |
| MlaD-Y152pBpa-N FWD | GGT CAG TTC CTT <b>TAG</b> GGT AGT AAA GGC         |
| MlaD-Y152pBpa-C REV | GCC TTT ACT ACC <b>CTA</b> AAG GAA CTG ACC         |
| MlaD-S154pBpa-N FWD | TTC CTT TAC GGT <b>TAG</b> AAA GGC GAT GAC         |
| MlaD-S154pBpa-C REV | GTC ATC GCC TTT <b>CTA</b> ACC GTA AAG GAA         |
| MlaD-N161pBpa-N FWD | GAT GAC AAT AAG <b>TAG</b> AGT GGC GAT GCG         |
| MlaD-N161pBpa-C REV | CGC ATC GCC ACT <b>CTA</b> CTT ATT GTC ATC         |
| MlaD-T175pBpa-N FWD | CCA GGT AAT AAT GAA <b>TAG</b> ACT GAA CCT GTG GGT |
| MlaD-T175pBpa-C REV | ACC CAC AGG TTC AGT <b>CTA</b> TTC ATT ATT ACC TGG |

---

\* Relevant restriction sites are underlined.

\*\*Relevant sites for mutagenesis are bolded.

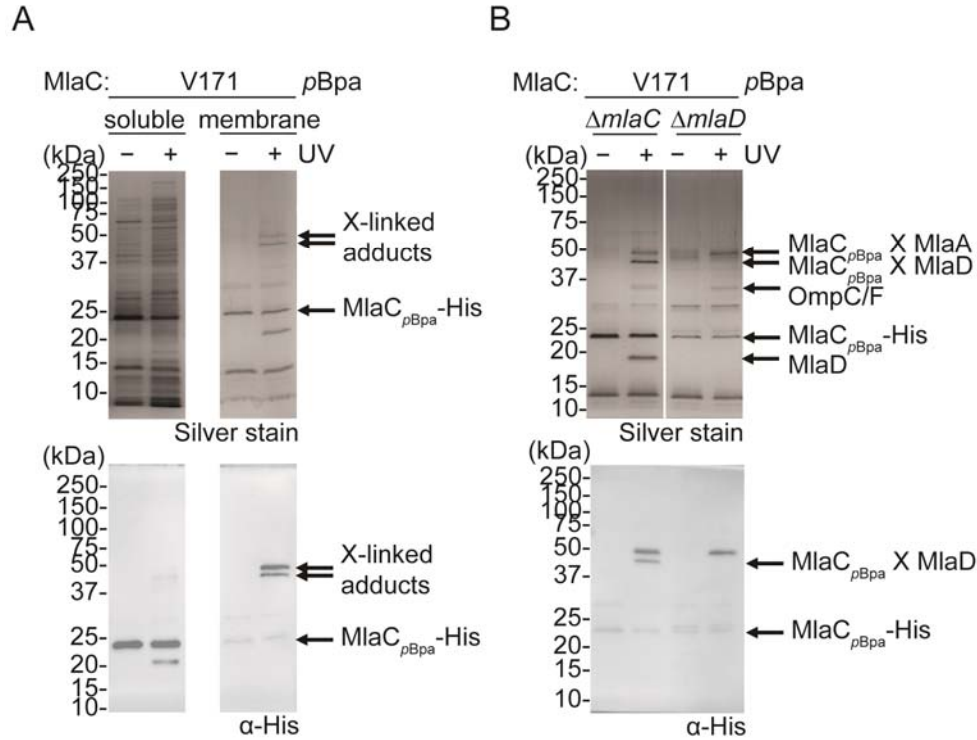

**Figure S1.** MlaC<sub>V171</sub>pBpa-His interacts with membrane proteins, including MlaD, in vivo. (A) Co-TALON affinity purification of the crosslinked adducts of MlaC<sub>V171</sub>pBpa-His in  $\Delta mlaC$  cells from both the soluble and membrane fractions. (B) SDS-PAGE and immunoblot analyses showing the presence or absence of UV-crosslinked and monomeric MlaD bands formed in  $\Delta mlaC$  or  $\Delta mlaD$  cells after Co-TALON affinity purification of the membrane fractions. Samples were heated before SDS-PAGE analysis and visualized by silver staining and/or immunoblots using  $\alpha$ -His antibodies.

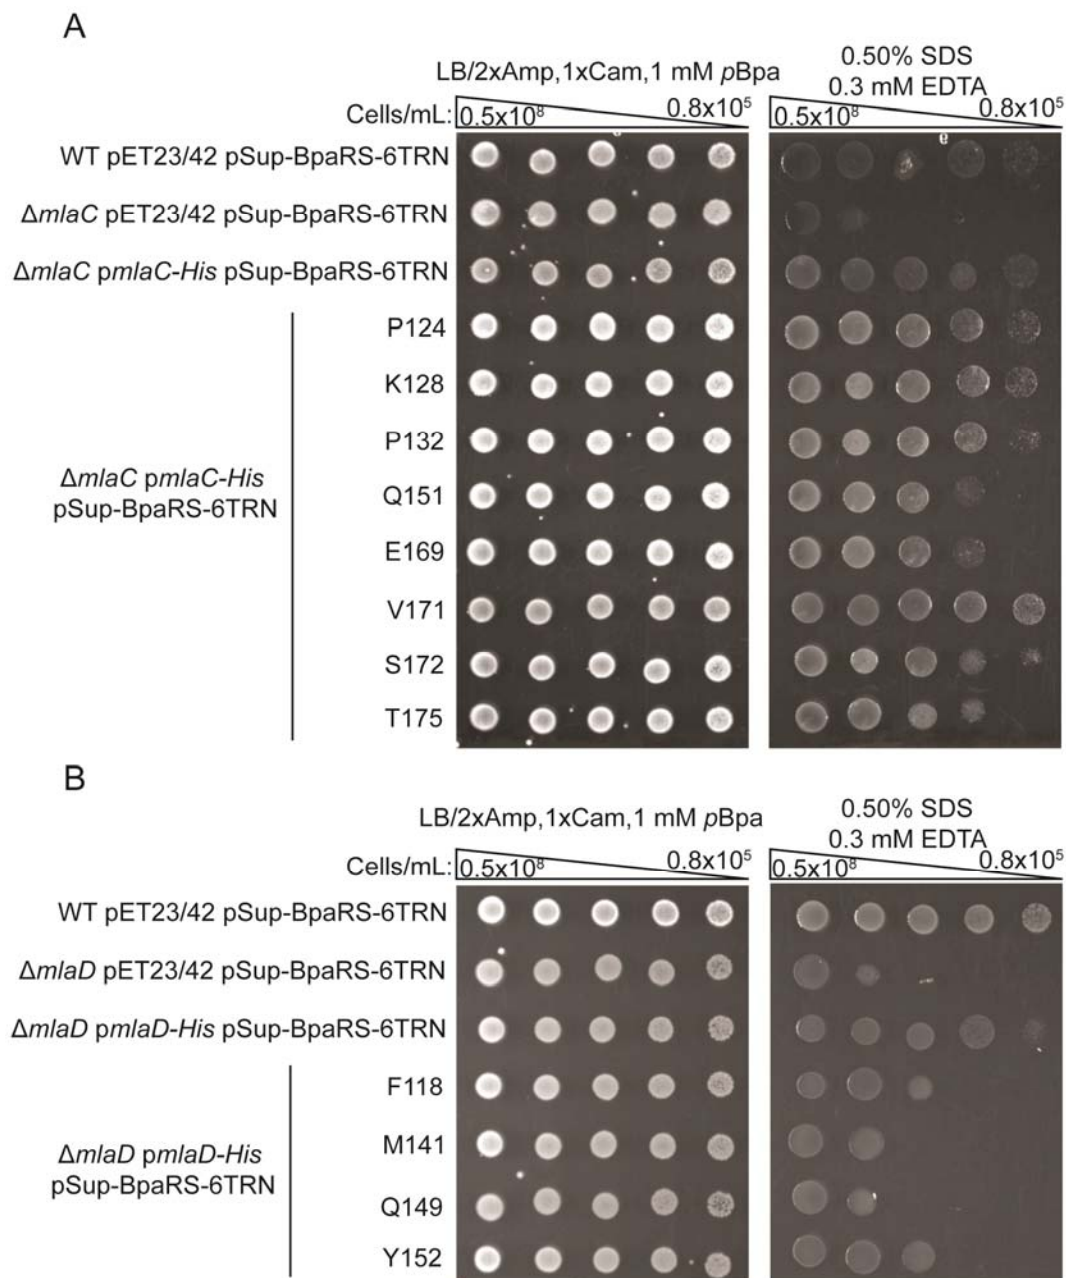

**Figure S2.** His-tagged MlaC<sub>*p*Bpa</sub> and MlaD<sub>*p*Bpa</sub> variants are able to partially complement the loss of chromosomally-encoded MlaC or MlaD, respectively. Analysis of SDS/EDTA sensitivity of (A)  $\Delta mlaC$  or (B)  $\Delta mlaD$  strains harboring pSup-BpaRS-6TRN<sup>5</sup> and producing the indicated His-tagged MlaC/D<sub>*p*Bpa</sub> variants at low levels from the pET23/42 vector. Serial dilutions of respective cultures were spotted on LB agar plates containing Amp, Cam, 1mM *p*Bpa,

supplemented with or without 0.5% SDS and 0.3 mM EDTA, as indicated, and incubated overnight at 37 °C. *mla* mutants are typically sensitive to 0.5% SDS only at high concentrations of EDTA (0.7-1.0 mM) but the presence of amber suppression in the strains here somehow made them sensitive even at 0.3 mM EDTA.

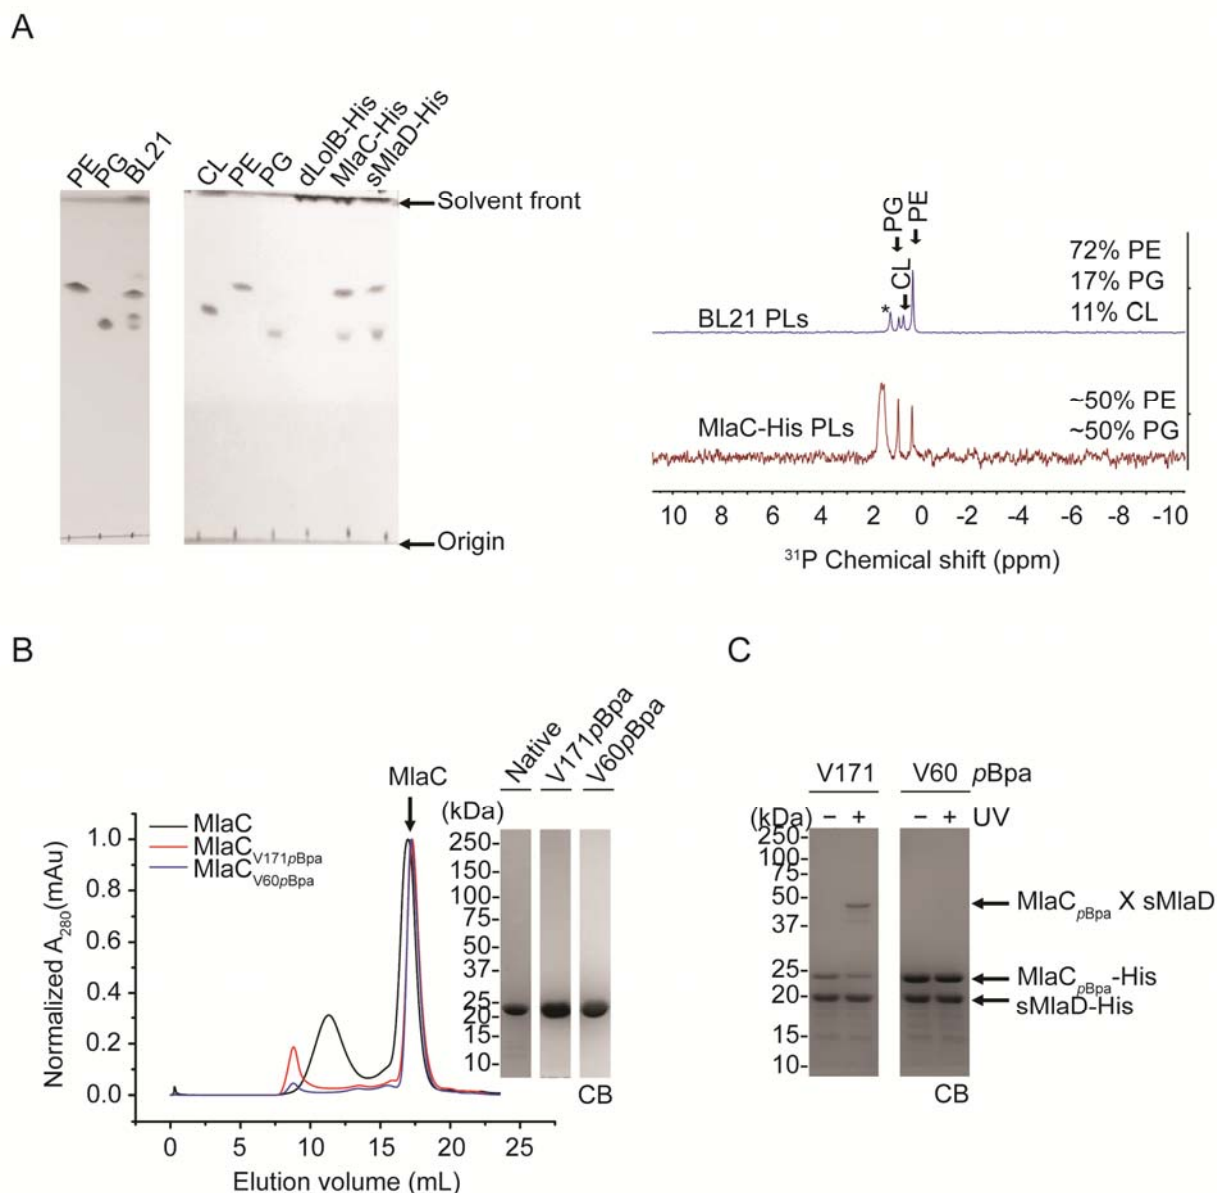

**Figure S3.** MlaC-His copurifies with PLs and interacts with the periplasmic soluble domain of MlaD in vitro. (A) TLC analysis of PLs extracted from BL21( $\lambda$ DE3) cells, purified soluble domain of LolB (dLolB-His), MlaC-His and sMlaD-His. dLolB-His was used as a negative control; LolB is the OM receptor for lipoproteins and has a hydrophobic cavity that does not bind PLs.<sup>9</sup>  $^{31}\text{P}$  NMR analysis of PLs extracted from BL21( $\lambda$ DE3) cells and purified MlaC-His in 5% Triton X-100. Peaks are assigned based on comparison with known PL standards.<sup>3</sup> Unknown peaks that cannot be assigned to any PL species in *E. coli* are annotated with asterisks (\*).

Compositions of bound PLs were obtained via integration of peak areas and normalized to the number of phosphorus atoms per PL molecule (i.e. one for PE/PG and two for CL). CL; cardiolipin, PE; phosphatidylethanolamine, PG; phosphatidylglycerol. (B) SEC profiles of WT MlaC-His, MlaC<sub>V171pBpa</sub>-His and MlaC<sub>V60pBpa</sub>-His purified from cells overexpressing each MlaC variant. Samples from the peak fraction were heated before SDS-PAGE analysis and visualized by Coomassie Blue (CB) staining. (C) CB-stained gel showing the presence or absence of UV-crosslinked adduct (MlaC<sub>pBpa</sub> X sMlaD) formed between purified sMlaD and MlaC<sub>V171pBpa</sub>-His or MlaC<sub>V60pBpa</sub>-His, respectively.

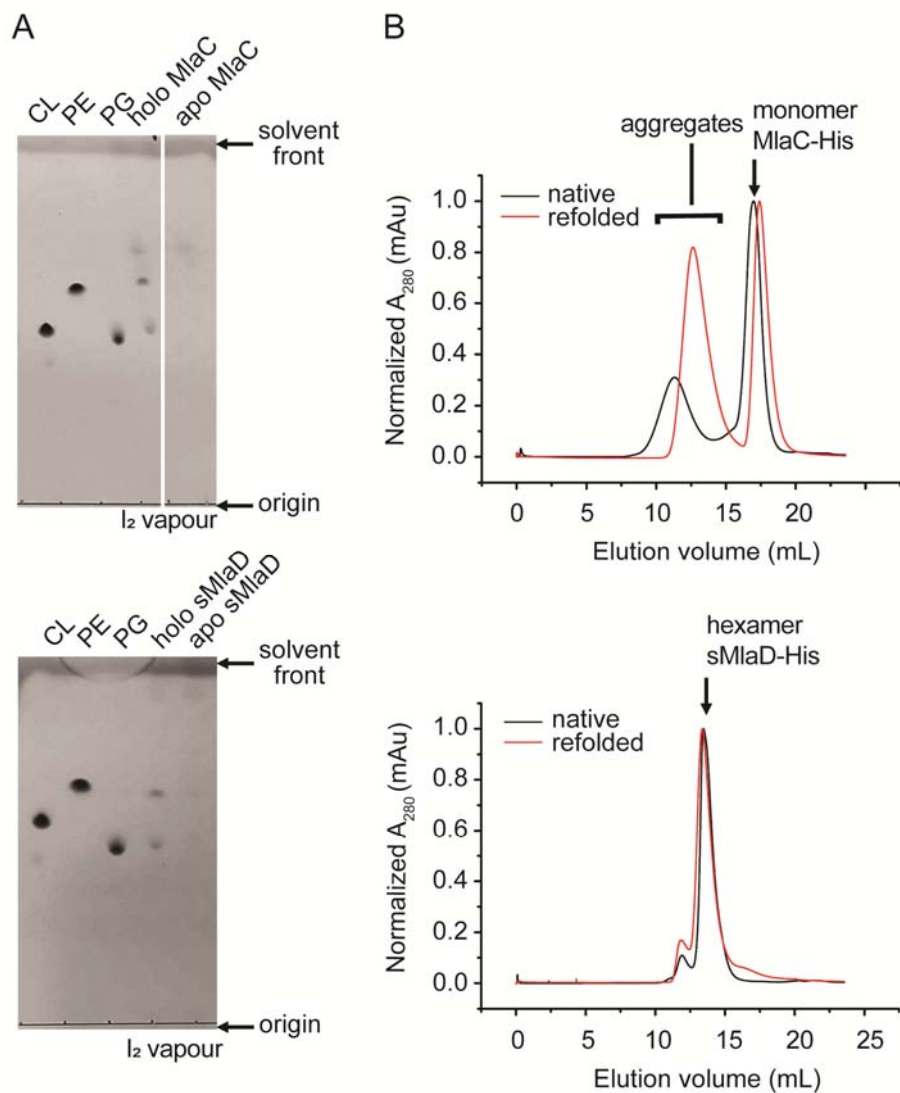

**Figure S4.** Refolded apo-MlaC and apo-sMlaD exhibit similar SEC profiles to their holo forms.

(A) TLC analyses of the organic extracts from purified and refolded apo-MlaC-His and apo-sMlaD-His showing the absence of PLs, in contrast to their holo forms. (B) SEC profiles of both refolded apo-MlaC-His and apo-sMlaD-His compared to holo proteins. Some aggregation of apo-MlaC-His was observed.

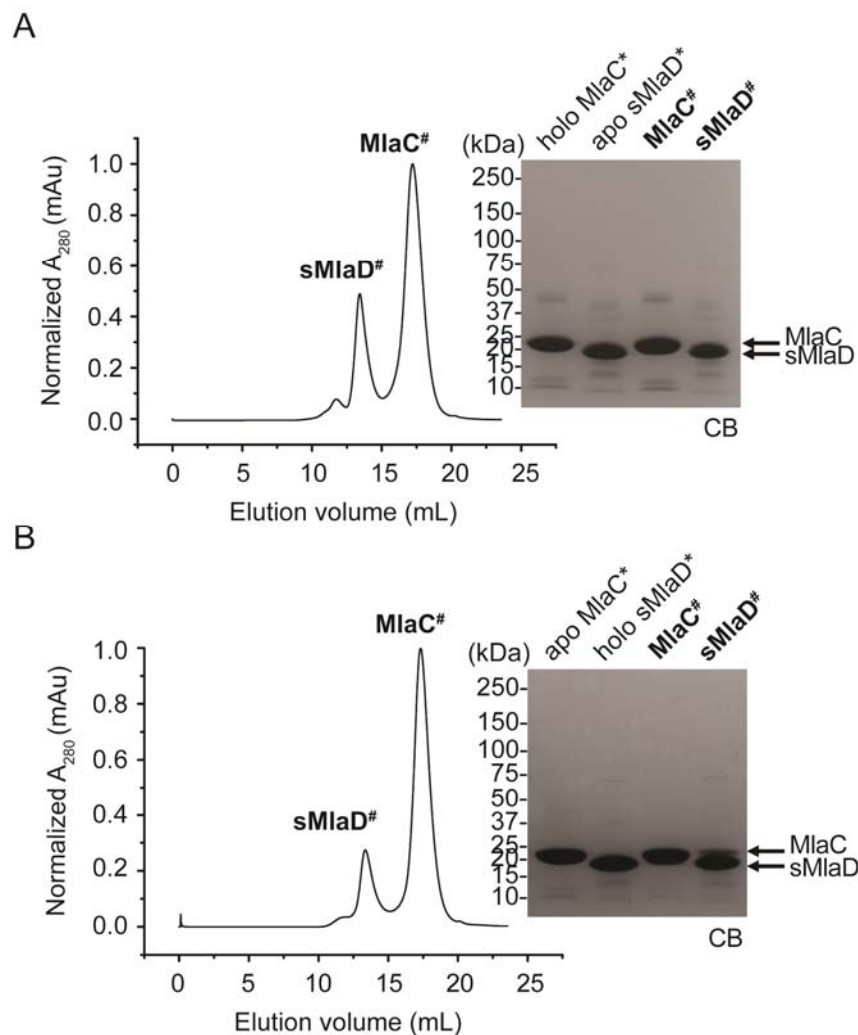

**Figure S5.** MlaC and sMlaD can be separated by SEC with minimal cross-contamination after incubation with each other. SEC profiles of sMlaD-His and MlaC-His separated after incubation between (A) holo-MlaC-His and apo-sMlaD-His and (B) holo-sMlaD-His and apo-MlaC-His. Samples from the respective peak fraction of the separated proteins prior to (marked by asterisks) and after incubation with each other (bolded/marked by hashes) were heated before SDS-PAGE and visualized by Coomassie Blue (CB) staining. PLs extracted from these proteins were analyzed by TLC and shown in Figure 3.



## Supplemental References

1. Silhavy TJ, Berman ML, Enquist LW (1984) *Experiments with Gene Fusions* (Cold Spring Harbor Laboratory Press, Plainview, N.Y.) pp xi-303.
2. Casadaban MJ (1976) Transposition and fusion of the *lac* genes to selected promoters in *Escherichia coli* using bacteriophage lambda and Mu. *J Mol Biol* 104(3):541-555.
3. Thong S., et al (2016) Defining Key Roles for Auxiliary Proteins in an ABC Transporter That Maintains Bacterial Outer Membrane Lipid Asymmetry. *Elife*:5:e19042.
4. Wu T., et al (2006) Identification of a protein complex that assembles lipopolysaccharide in the outer membrane of *Escherichia coli*. *Proc Natl Acad Sci U S A* 103(31):11754-11759.
5. Chin, J. W.; Martin, A. B.; King, D. S.; Wang, L.; Schultz, P. G. Addition of a Photocrosslinking Amino Acid to the Genetic Code of *Escherichia coli*. *Proc. Natl. Acad. Sci.* **2002**, 99 (17), 11020–11024.
6. Laemmli UK (1970) Cleavage of structural proteins during the assembly of the head of bacteriophage T4. *Nature* 227(5259):680-685.
7. Chong, Z. S.; Woo, W. F.; Chng, S. S. Osmoporin OmpC Forms a Complex with MlaA to Maintain Outer Membrane Lipid Asymmetry in *Escherichia coli*. *Mol. Microbiol.* **2015**, 98 (6), 1133–1146.
8. Bligh, E. .; Dyer, W. . Canadian Journal of Biochemistry and Physiology. *J. Biochem. Physiol.* **1959**, 37 (8), 911–917.
9. Takeda, K.; Miyatake, H.; Yokota, N.; Matsuyama, S.; Tokuda, H.; Miki, K. Crystal Structures of Bacterial Lipoprotein Localization Factors, LolA and LolB. *EMBO J.* 2003, 22 (13), 3199–3209.
10. Chin, J. W.; Martin, A. B.; King, D. S.; Wang, L.; Schultz, P. G. Addition of a

Photocrosslinking Amino Acid to the Genetic Code of Escherichia Coli. *Proc. Natl. Acad. Sci.* **2002**, 99 (17), 11020–11024.

11. Chovancova, E.; Pavelka, A.; Benes, P.; Strnad, O.; Brezovsky, J.; Kozlikova, B.; Gora, A.; Sustar, V.; Klvane, M.; Medek, P.; et al. CAVER 3.0: A Tool for the Analysis of Transport Pathways in Dynamic Protein Structures. *PLoS Comput. Biol.* **2012**, 8 (10), 23–30.
12. Ekiert, D. C.; Bhabha, G.; Isom, G. L.; Greenan, G.; Ovchinnikov, S.; Henderson, I. R.; Cox, J. S.; Vale, R. D. Architectures of Lipid Transport Systems for the Bacterial Outer Membrane. *Cell* **2017**, 169 (2), 273–285.e17.
